# Supplementary material for: Gender-concordant identity documents and mental health among transgender adults in the USA: a cross-sectional study
Source: PubMed Central journal article supplement (PMC9912749; doi:10.1016/s2468-2667(20)30032-3), 2020-03-17
Supplement: NIHMS1860610-supplement-Supplement.pdf [file NIHMS1860610-supplement-Supplement.pdf]

# THE LANCET

## Public Health

### Supplementary appendix

This appendix formed part of the original submission and has been peer reviewed. We post it as supplied by the authors.

Supplement to: Scheim AI, Perez-Brumer AG, Bauer GR. Gender-concordant identity documents and mental health among transgender adults in the USA: a cross-sectional study. *Lancet Public Health* 2019; published online March 16. [http://dx.doi.org/10.1016/S2468-2667\(20\)30032-3](http://dx.doi.org/10.1016/S2468-2667(20)30032-3).

**Supplementary Figure 1: Directed Acyclic Graph**

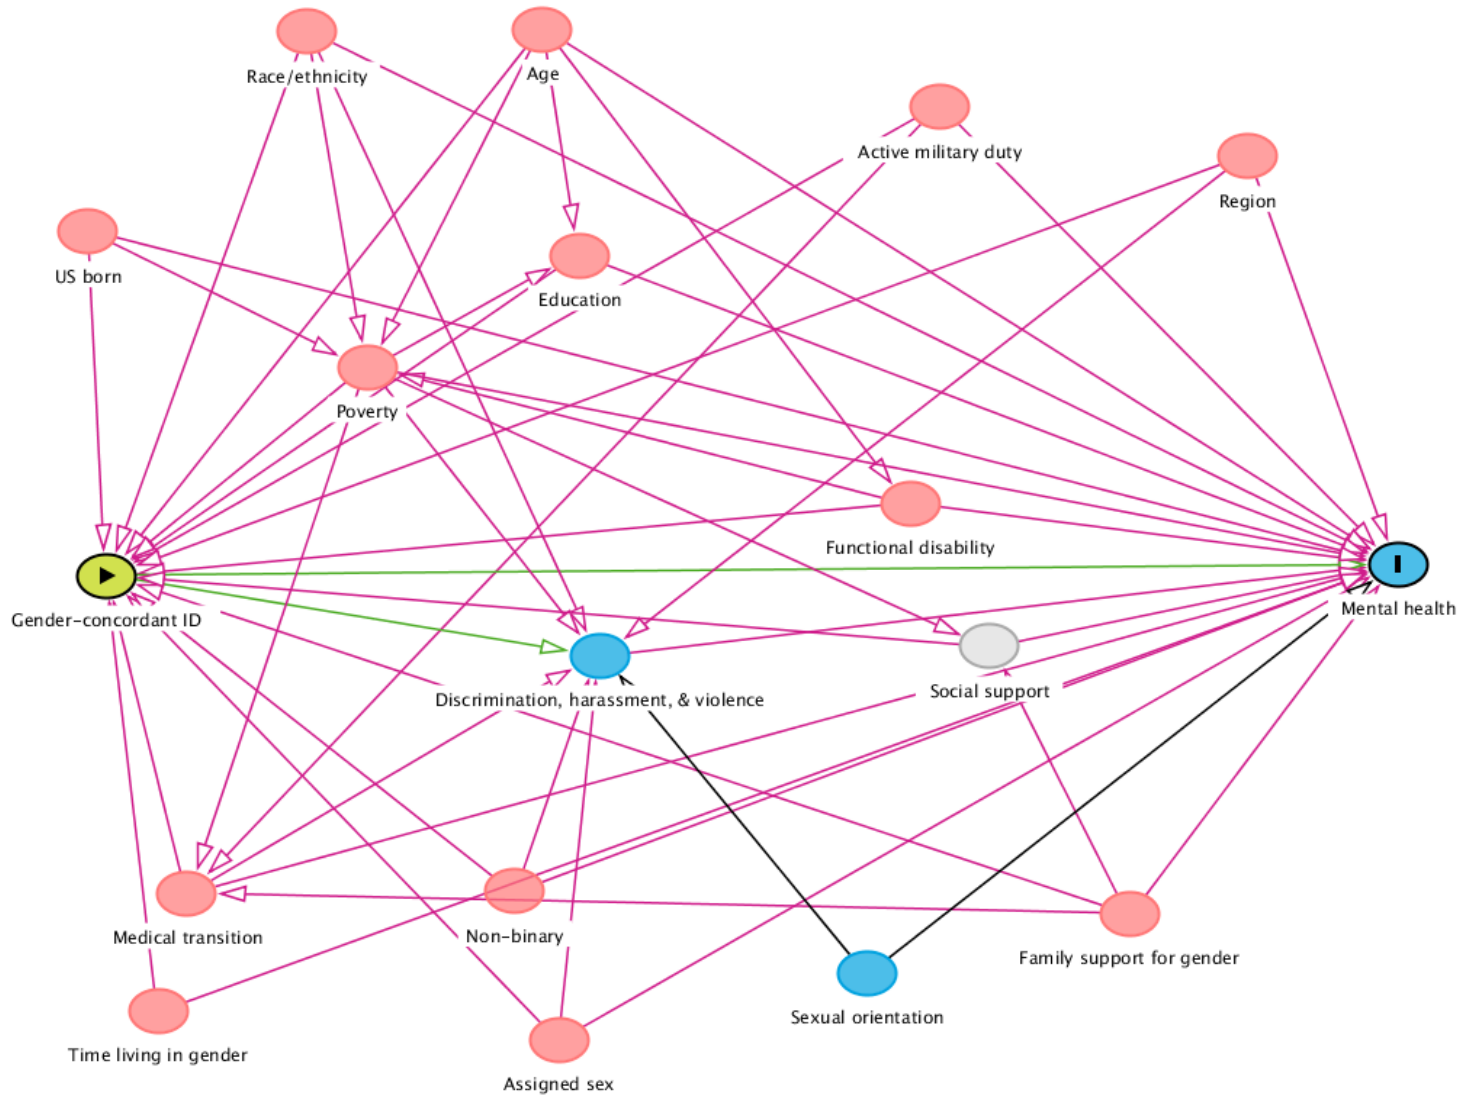

**Software:** Textor J, van der Zander B, Gilthorpe MK, Liskiewicz M, Ellison GTH. Robust causal inference using directed acyclic graphs: the R package 'dagitty'. *Int J Epidemiol* 2016; 45(6):1887-1894.

**TABLE S1. Frequency of having identity documents with one's preferred name**

| Identity Documents Reflect Name | n (weighted%) |
|---------------------------------|---------------|
| None                            | 10615 (46.6)  |
| Some                            | 5579 (25.1)   |
| All                             | 6092 (28.3)   |

**TABLE S2. Associations between having identity documents with one's preferred name and psychological distress**

| Identity Documents Reflect Name | Unadjusted <i>b</i><br>(95% CI) | Adjusted <i>b</i> *<br>(95% CI) | Unadjusted PR <sup>†</sup><br>(95% CI) | Adjusted PR* <sup>†</sup><br>(95% CI) |
|---------------------------------|---------------------------------|---------------------------------|----------------------------------------|---------------------------------------|
| None                            | --                              | --                              | 1.00                                   | 1.00                                  |
| Some                            | -2.93 (-3.20, -2.65)            | -0.66 (-0.90, -0.41)            | 0.61 (0.57, 0.65)                      | 0.91 (0.85, 0.96)                     |
| All                             | -3.13 (-3.40, -2.85)            | -1.16 (-1.40, -0.92)            | 0.59 (0.56, 0.63)                      | 0.82 (0.77, 0.87)                     |

\* Adjusted for age, gender, race/ethnicity, education, poverty, census region, US-born, functional disability, active military duty, medical transition status, family support, and years living full-time in gender.

† Prevalence ratio for serious psychological distress (Kessler 6  $\geq$  13)

**TABLE S3. Associations between having identity documents with one's preferred name and suicide risk**

| Identity Documents Reflect Name | Suicidal ideation          |                                       | Suicide plan               |                                       | Suicide attempt            |                                       |
|---------------------------------|----------------------------|---------------------------------------|----------------------------|---------------------------------------|----------------------------|---------------------------------------|
|                                 | Unadjusted PR*<br>(95% CI) | Adjusted PR* <sup>†</sup><br>(95% CI) | Unadjusted PR*<br>(95% CI) | Adjusted PR* <sup>†</sup><br>(95% CI) | Unadjusted PR*<br>(95% CI) | Adjusted PR* <sup>†</sup><br>(95% CI) |
| None                            | 1.00                       | 1.00                                  | 1.00                       | 1.00                                  | 1.00                       | 1.00                                  |
| Some                            | 0.74 (0.71, 0.78)          | 0.95 (0.91, 0.99)                     | 0.74 (0.69, 0.80)          | 1.01 (0.92, 1.10)                     | 0.68 (0.58, 0.80)          | 0.98 (0.83, 1.17)                     |
| All                             | 0.70 (0.66, 0.73)          | 0.89 (0.85, 0.93)                     | 0.60 (0.55, 0.65)          | 0.82 (0.75, 0.90)                     | 0.55 (0.46, 0.65)          | 0.88 (0.73, 1.05)                     |

\* Prevalence Ratio

† Adjusted for age, gender, race/ethnicity, education, poverty, census region, US-born, functional disability, active military duty, medical transition status, family support, and years living full-time in gender.

**TABLE S4. Frequency of having identity documents with one's preferred gender marker**

| Identity Documents Reflect Gender | n (weighted%) |
|-----------------------------------|---------------|
| None                              | 14382 (63.8)  |
| Some                              | 5363 (24.5)   |
| All                               | 2541 (11.7)   |

**TABLE S5. Associations between having identity documents with one's preferred gender marker and psychological distress**

| Identity Documents Reflect Gender | Unadjusted <i>b</i> (95% CI) | Adjusted <i>b</i> * (95% CI) | Unadjusted PR <sup>†</sup> (95% CI) | Adjusted PR* <sup>†</sup> (95% CI) |
|-----------------------------------|------------------------------|------------------------------|-------------------------------------|------------------------------------|
| None                              | --                           | --                           | 1.00                                | 1.00                               |
| Some                              | -3.08 (-3.33, -2.82)         | -0.59 (-0.84, -0.34)         | 0.56 (0.53, 0.60)                   | 0.87 (0.81, 0.93)                  |
| All                               | -4.66 (-5.00, -4.32)         | -1.64 (-1.98, -1.31)         | 0.42 (0.38, 0.47)                   | 0.71 (0.63, 0.78)                  |

\* Adjusted for age, gender, race/ethnicity, education, poverty, census region, US-born, functional disability, active military duty, medical transition status, family support, and years living full-time in gender.

† Prevalence ratio for serious psychological distress (Kessler 6  $\geq$  13)

**TABLE S6. Associations between having identity documents with one's preferred gender marker and suicide risk**

| Identity Documents Reflect Gender | Suicidal ideation       |                                    | Suicide plan            |                                    | Suicide attempt         |                                    |
|-----------------------------------|-------------------------|------------------------------------|-------------------------|------------------------------------|-------------------------|------------------------------------|
|                                   | Unadjusted PR* (95% CI) | Adjusted PR* <sup>†</sup> (95% CI) | Unadjusted PR* (95% CI) | Adjusted PR* <sup>†</sup> (95% CI) | Unadjusted PR* (95% CI) | Adjusted PR* <sup>†</sup> (95% CI) |
| None                              | 1.00                    | 1.00                               | 1.00                    | 1.00                               | 1.00                    | 1.00                               |
| Some                              | 0.72 (0.69, 0.76)       | 0.95 (0.90, 0.99)                  | 0.73 (0.68, 0.79)       | 1.01 (0.91, 1.11)                  | 0.76 (0.64, 0.90)       | 1.14 (0.95, 1.37)                  |
| All                               | 0.56 (0.52, 0.60)       | 0.80 (0.74, 0.87)                  | 0.52 (0.45, 0.59)       | 0.81 (0.70, 0.93)                  | 0.59 (0.45, 0.75)       | 1.14 (0.87, 1.49)                  |

\* Prevalence Ratio

† Adjusted for age, gender, race/ethnicity, education, poverty, census region, US-born, functional disability, active military duty, medical transition status, family support, and years living full-time in gender.
